1 **Title:** A simulation study of the use of temporal occupancy for identifying core and transient  
2 species

3 **Authors:** Sara Snell Taylor<sup>1\*</sup>, Jessica R. Coyle<sup>2</sup>, Ethan P. White<sup>3,4</sup>, Allen H. Hurlbert<sup>1,5</sup>

4 \*Corresponding author email: [ssnell@live.unc.edu](mailto:ssnell@live.unc.edu)

5 <sup>1</sup>Department of Biology, CB 3280, University of North Carolina, Chapel Hill, North Carolina  
6 27599, USA

7 <sup>2</sup>Department of Biology, Saint Mary's College of California, Moraga, CA 94575, USA

8 <sup>3</sup>Department of Wildlife Ecology and Conservation, 110 Newins-Ziegler Hall, PO Box 110430,  
9 University of Florida, Gainesville, FL 32611-0430, USA

10 <sup>4</sup>Informatics Institute, 432 Newell Drive, PO Box 115585, University of Florida, Gainesville, FL  
11 32611-8545, USA

12 <sup>5</sup>Curriculum for the Environment and Ecology, University of North Carolina, Chapel Hill, North  
13 Carolina 27599, USA

14

## 15 **Abstract**

16

17 Transient species, which do not maintain self-sustaining populations in a system where  
18 they are observed, are ubiquitous in nature and their presence often impacts the interpretation of  
19 ecological patterns and processes. Identifying transient species from temporal occupancy, the  
20 proportion of time a species is observed at a given site over a time series, is subject to  
21 classification errors as a result of imperfect detection and source-sink dynamics. We use a  
22 simulation-based approach to assess how often errors in detection or classification occur in order  
23 to validate the use of temporal occupancy as a metric for inferring whether a species is a core or

24 transient member of a community. We found that low detection increases error in the  
25 classification of core species, while high habitat heterogeneity and high detection increase error  
26 in classification of transient species. These findings confirm that temporal occupancy is a valid  
27 metric for inferring whether a species can maintain a self-sustaining population, but imperfect  
28 detection, low abundance, and highly heterogeneous landscapes may yield high misclassification  
29 rates.

30

31

32

33

## 34 **Introduction**

35

36 Understanding the processes underlying community assembly is one of the primary goals  
37 of community ecology. Traditional approaches make inferences about community processes based  
38 on the set of species identified as community members, typically those observed at a study site  
39 (1,2). Data on communities are typically gathered via field surveys at a given site for one or more  
40 time points. However, the record of species from such community surveys often includes transient  
41 or sink species that do not maintain self-sustaining populations in that community (3). A growing  
42 number of studies use temporal occupancy, or the proportion of a multi-year time series over which  
43 a species is observed, to determine which species are "core" members of their communities and  
44 which species are transient (3–9). Temporal occupancy provides a quantitative measure of  
45 persistence within a community over time and its distribution tends to be bimodal (3), facilitating  
46 the distinction between core and transient status, but ecological data collection is imperfect and

47 using temporal occupancy to infer core or transient classification is susceptible to classification  
48 error.

49 One type of error is inferring that a species is transient when it is actually a core member  
50 of the community. A self-sustaining species that is present on the landscape every year may fail to  
51 be observed in some years, and hence be misclassified as a transient species, for three primary  
52 reasons (Table 1). These missed detections can occur due to low population densities (10–12), less  
53 conspicuous morphology (e.g., drab plumage) or behavior (e.g., singing quietly or infrequently;  
54 Cunningham et al. 1999, Kéry and Royle 2008), and habitat structure with characteristics that limit  
55 the distance over which individuals can be detected (e.g., dense vegetation) (15–18). Although the  
56 effect of imperfect detectability on temporal occupancy and species classification is qualitatively  
57 understood, it is unclear how frequently and at what levels of detectability and abundance such  
58 errors occur.

59 The opposite classification error is also possible, where a species is inferred to be a core  
60 member of a community based on frequent occurrence in a time series, even though it does not  
61 maintain a locally viable population (Table 1). Some individuals of a species are observed  
62 regularly in habitats in which they do not successfully reproduce by dispersing in from adjacent  
63 suitable habitat (19,20). For example, in plants, seeds might be regularly dispersed into  
64 inhospitable habitats (21) and in birds, younger and lower quality males are often displaced by  
65 dominant males to adjacent, suboptimal habitats (22). In such cases, the temporal frequency with  
66 which a species is observed might be a poor indicator of the extent to which a species can actually  
67 maintain a viable population in that location.

68 Understanding the frequency of classification errors and the factors that affect those errors  
69 is critical for properly interpreting patterns based on temporal occupancy. Here, we use a

70 simulation-based approach to examine community dynamics—based on death, birth, dispersal,  
71 and establishment—on complex, dual-habitat landscapes in which species' habitat associations are  
72 known. We varied average species' detectability and habitat heterogeneity of the simulated  
73 landscapes to assess how these variables affect rates of misclassification. We expect that core  
74 species are more likely to be misclassified as transients when either detectability or abundance is  
75 low. In contrast, we expect that species that do not successfully breed in a habitat are more likely  
76 to be misclassified as core members when the local community is embedded within a more  
77 heterogeneous landscape, which increases the likelihood of mass effects from adjacent habitats.

78

## 79 **Methods**

### 80 *Simulation model*

81 Each simulation began by generating an initial landscape, species pool, and global species  
82 abundance distribution (GSAD). The 32 x 32 pixel landscape was made up of two distinct habitat  
83 types, A and B, with a parameter for the proportion of the landscape made up of habitat type A  
84 ( $h_A$ ; Figure 1A). Each grid cell represented a local community with a fixed community carrying  
85 capacity of 100 total individuals of any species. The species pool contained 40 total species, with  
86 half that could only reproduce successfully in habitat A and half that could only reproduce  
87 successfully in habitat B. The GSAD was a vector of relative species abundances assigned from a  
88 lognormal distribution that defined the relative probability that an immigrant from outside the  
89 landscape would belong to each species. Initially, the landscape was filled to carrying capacity  
90 with individuals drawn randomly from the GSAD.

91 In each time step, meant to represent one year, the following four processes were modeled:

92           1) *Death*. The probability of mortality for each individual at a time step was 0.5 (Figure  
93 1B). Death rates were independent of the habitat type in which the species occurred.

94           2) *Birth*. All individuals occurring within their preferred habitat type produced two  
95 offspring per time step, while individuals occurring in a non-preferred habitat type did not  
96 reproduce. Offspring were termed “propagules” until they established in a community (see below;  
97 Figure 1C).

98           3) *Dispersal*. Newly generated propagules dispersed in random directions by a distance  
99 drawn from a half-Gaussian distribution with a mean of 1.24 grid cells (95% of movements result  
100 in dispersal distances  $\leq 4$  grid cells; Figure 1D). Established individuals (i.e. adults) only dispersed  
101 if they were in non-preferred habitats. We also explored dispersal kernels that were narrower (95%  
102 of movements within 2 grid cells) or broader (95% of movements within 8 grid cells) to confirm  
103 that results were qualitatively similar. Results for these simulations are presented in Supplemental  
104 Material (Figure S1-S6, Table S1-S2).

105           4) *Establishment*. Empty spaces in each community were colonized by either a migrant  
106 from outside the community (drawn probabilistically from the GSAD) with a constant immigration  
107 rate probability (0.001) or by an individual selected randomly from the pool of new or dispersing  
108 propagules. Once individuals became established, they only left their community via dispersal or  
109 death (Figure 1E). Propagules that did not establish were eliminated at the end of each time step.

110           We ran simulations for 200 time steps, which was long enough for species richness to  
111 achieve equilibrium in the landscape, and used the last 15 time steps to calculate temporal  
112 occupancy. Fifteen time steps represented an ecological dataset with a 15-year time series, a  
113 sampling period used in several previous studies which provides a reasonably high resolution

114 estimate of temporal occupancy (7,23). Additionally, we calculated landscape-wide abundances  
115 for each species at the end of the simulation.

116 We ran 50 replicate simulations for values of  $h_A \in \{0.5, 0.6, 0.7, 0.8, 0.9\}$  to generate  
117 landscapes that were more (high  $h_A$ ) or less (low  $h_A$ ) homogeneous. For each simulation, we also  
118 imposed a stochastic detection process in which we varied the probability of detecting an  
119 individual known to be present,  $p$ , from 0.1 to 1.0 in increments of 0.1. Detection probability was  
120 assumed to be both species- and habitat-independent. This resulted in a vector of "observed"  
121 species abundances in each grid cell at each time step.

### 122 *Simulation analysis*

123 We examined the temporal dynamics of species within a single, centrally located pixel for  
124 each simulation run. Based on the habitat type of the focal pixel, all species either could (core) or  
125 could not (transient) reproduce within that pixel and hence maintain a viable population. We refer  
126 to this as their biological, or true, status. In addition, each species was classified as core or transient  
127 based on temporal occupancy over the last 15 years of the simulation run. Species observed in five  
128 years or fewer ( $\leq 33\%$ ) were classified as transient while species observed in more than ten years  
129 ( $> 66\%$ ) were classified as core. For these analyses we ignored the minority of species with  
130 intermediate temporal occupancy which could not be unambiguously assigned to core or transient  
131 status. Thus, each of the species we considered fell into one of the four categories shown in Table  
132 1. For each simulation run, we calculated the rate of misclassifying core species and the rate of  
133 misclassifying transient species (Table 1). Error rates were examined as a function of average  
134 detection probability and landscape similarity in the  $7 \times 7$  pixel region surrounding the focal pixel,  
135 which was calculated as the proportion of the regional window that was the same habitat type as  
136 the focal pixel. Number of species and classification error rates were predicted by detection

137 probability and landscape similarity using ordinary least squares linear models. The relationship  
138 between species abundance and core species classification at detection = 0.5 was assessed using a  
139 generalized linear model with a logit link.

140

## 141 **Results**

142 Communities in homogeneous landscapes (e.g., Figure 2a) typically had a large number of  
143 true core species and only a few true transient species at any given point in time (Figure 2b).  
144 Turnover in the identity of the transient species from one time step to the next resulted in a mode  
145 of low temporal occupancy within an overall bimodal distribution of temporal occupancy (Figure  
146 2c). Communities in heterogeneous landscapes (e.g., Figure 2d) had more true transient species  
147 appear in their non-preferred habitat type in any given time step due to the greater area of potential  
148 sources of colonization (Figure 2e). Many of these transient species were maintained by repeated  
149 dispersal from the alternate habitat type in the surrounding landscape such that they had moderate  
150 to high values of temporal occupancy (Figure 2f).

151 The number of true core species (those maintaining a locally viable population) observed  
152 in a pixel increased with detection probability (estimate = 1.11,  $p < 2e-16$ ), and even more so with  
153 landscape similarity (estimate = 5.82,  $p < 2e-16$ ; Figure 3a). More variance in the number of true  
154 core species could be explained by landscape similarity ( $R^2 = 36\%$ ) than detection probability ( $R^2$   
155 = 2%). The number of true transient species (those not maintaining a viable population) observed  
156 increased with detection probability (estimate = 5.29,  $p < 2e-16$ ) and decreased strongly with  
157 landscape similarity (estimate = -27.14,  $p < 2e-16$ ; Figure 3b). More variance in the number of  
158 true transient species could be explained by landscape similarity ( $R^2 = 74\%$ ) than detection ( $R^2 =$   
159 5%).

160 Species that were true core members of the focal community were more likely to be  
161 incorrectly inferred as transient at low detection probabilities (estimate = -0.41,  $p < 2e-16$ ) and  
162 low landscape similarities (estimate = -0.27,  $p < 2e-16$ ; Figure 4a). More variance in the  
163 proportion of misclassified core species could be explained by detection ( $R^2 = 46\%$ ) than  
164 landscape similarity ( $R^2 = 11\%$ ). Error rates were close to zero when landscape similarity was  
165 greater than 0.6 and detection probability was greater than 0.3 and increased most noticeably  
166 when detection probability was 0.1, the lowest detection rate examined.

167 Transient species that did not reproduce in the focal habitat but that regularly occurred  
168 there were incorrectly inferred as core most often at high detection probabilities (estimate = 0.20,  
169  $p < 2e-16$ ) and low landscape similarities (estimate = -0.52,  $p < 2e-16$ ; Figure 4b). More variance  
170 in the proportion of misclassified transient species could be explained by landscape similarity ( $R^2$   
171 = 48%) than detection ( $R^2 = 13\%$ ). Error rates for classifying transient species were zero or near  
172 zero when landscape similarity was greater than 0.5. Transient species misclassification rates  
173 were greatest when landscape similarity was less than 0.4, where the majority of colonization  
174 events came from the opposite habitat type, such that poorly adapted species appeared in the  
175 focal habitat repeatedly over time. This was exacerbated at high detection probability, which  
176 ensured these true transient occurrences were observed and therefore misclassified. Additionally,  
177 species with low landscape-wide abundance were more likely to be misclassified as transient  
178 when they were truly core members of their community, while the odds of misclassifying a core  
179 species were less than 13% for species whose abundance was at least 12% of the most abundant  
180 species (estimate = 7.02,  $p < 2.2e-16$ ; Figure 5).



181 Results were similar using both narrower and broader dispersal kernels (Figure S1-S6,  
182 Table S1-S2), with narrow kernels having slightly more variance in classification rate than  
183 broader kernels.

184

## 185 **Discussion**

186 Several studies have used temporal occupancy to infer the persistence of populations over  
187 time and the degree to which a species can be considered a core member of a community in a  
188 particular location (3,7–9,23). Our simulations showed that in many realistic scenarios, this is a  
189 valid approach, but also confirmed that temporal occupancy is subject to misclassification errors  
190 where core species are inferred to be transient and transient species are inferred to be core. As  
191 expected, low detection probabilities resulted in more frequent misclassification of core species as  
192 transient. Rare species were also more likely misclassified as transient. Low landscape similarity,  
193 when combined with high detection probabilities, resulted in transient species more frequently  
194 being misclassified as core.

195 Imperfect individual detection influenced the rate at which core species were misclassified  
196 as transients through failing to detect species when they were actually present. These species were  
197 more likely to be inferred as transient at lower detection probabilities. However, error rates for  
198 core species misidentified as transients were quite low as long as detection probabilities were  
199 greater than approximately 0.3. This threshold of 0.3 is at the low end of detection probabilities  
200 observed for most bird species, with most species exhibiting substantially higher rates of detection  
201 (24–26). Specifically, Boulinier *et al.* (1998) found that across a range of habitats in North  
202 America, average detection probabilities for species richness estimates using the Breeding Bird  
203 Survey ranged from 0.65 to 0.85. Johnston *et al.* (2014) found that the least detectable family of

204 birds was *Paridae*, which had a median detectability of 0.27, and the majority of other families  
205 had detection probabilities greater than 0.3. Overall, these findings suggest that the  
206 misclassification of core species is unlikely to be common except at unusually low detection  
207 probabilities that may be relevant for only a small minority of species.

208       Misclassification of transient species as core species was associated with high habitat  
209 heterogeneity. Species occurred in habitats to which they were poorly adapted because of dispersal  
210 from nearby source populations. The greater the surrounding area containing source populations,  
211 the greater the chance of repeated dispersal into nearby sink habitats causing the species to be  
212 regularly detected through time (20). These errors became prevalent when 60% or more of the  
213 surrounding landscape was different from the focal habitat. Our simulation model assumed that  
214 dispersal of new propagules was random with respect to habitat type, but if dispersal was biased  
215 toward the preferred habitat type (which seems likely for organisms with active dispersal; i.e.,  
216 Johnston et al. 2014), it would reduce the frequency of transient occurrences and therefore reduce  
217 observed error rates. The rate at which transient species were misclassified as core species also  
218 decreased with decreasing detection probability because at low detections, errors caused by  
219 repeated dispersal from adjacent source habitats were canceled out by detection errors. Overall,  
220 these results suggests that misclassification of transient species is unlikely to be common except  
221 in highly fragmented landscape configurations with unbiased dispersal.

222       Geographic patterns in the relative prevalence of core and transient species can influence  
223 our understanding of ecological communities when failing to recognize this distinction (7,23),  
224 especially if the probability of misclassification varies geographically. One likely source for this  
225 is detection probability, which is thought to vary along environmental gradients. In particular, it  
226 has been suggested that average detectability decreases along continental to global productivity

227 gradients because species are more difficult to detect in more densely vegetated environments (17).  
228 However, despite such a potential bias, past work has shown that there is typically a positive  
229 relationship between either temporal occupancy or species richness and remotely sensed proxies  
230 for productivity, meaning the observed patterns were opposite what would be predicted purely  
231 from a detectability effect (7,17,23). As such, these patterns of occupancy and richness were  
232 observed despite, and not because of, geographic variation in detectability. Other studies have  
233 suggested that birds sing more frequently in densely forested habitats so aural-based sampling  
234 should not observe this effect in forests, but in open habitats (24). In these cases, variation in  
235 detection probability alone has the potential to generate apparent patterns in richness or abundance,  
236 with misclassification rates of species varying across the gradient.

237         While we parameterized our simulation model to loosely reflect the biology of songbirds  
238 (e.g. reproductive rate, dispersal distance), the inferences that can be made from this simulation  
239 model are more broadly generalizable. We chose to focus on birds because they are highly  
240 mobile, can disperse widely, and have been studied empirically in this core-transient context  
241 (3,7,23). These first two attributes make temporal occupancy particularly useful for identifying  
242 core and transient birds in communities, but also potentially more prone to errors due to source-  
243 sink dynamics.

244         Detectability is dependent on both species attributes and the environment. Some species  
245 are inherently more detectable due to variation in species color, size, and behavior. A large,  
246 colorful bird perched conspicuously or that sings loudly and frequently is detected more often  
247 than a little brown bird in the undergrowth, given they occur at equal densities. Our study is most  
248 relevant for considering how detection probability covaries along an environmental gradient,  
249 where detection probability likely varies on average across all species, than for considering how

250 detection probability varies among species. Nevertheless, species known to have low detection  
251 probabilities will presumably require more targeted monitoring efforts, and temporal occupancy  
252 should be used with caution to infer population persistence and habitat suitability for such  
253 species.

254         The aim of our simulation model was to capture how frequently species are misclassified  
255 within the core-transient temporal occupancy framework. Therefore, we focused on landscape  
256 similarity and detectability, but other parameters could also play a role in determining the  
257 effectiveness of temporal occupancy. In our study, birth rates and death rates were constant, so  
258 increasing the birth rates or decreasing death rates of species occurring in their preferred habitats  
259 could allow specialists to reach equilibrium in a habitat more quickly, decreasing the number of  
260 transient species in the community. Additionally, varying immigration rates across species could  
261 enable one species to immigrate more effectively into new habitats than other species, but in our  
262 study, immigration rate and dispersal rate were analogous because both allowed species to colonize  
263 new habitats. We addressed alternative rates of dispersal into new cells by varying the dispersal  
264 kernels in supplementary analyses, which demonstrated that only at very low dispersal rates do  
265 detection and landscape similarity affect core and transient classification.

266         In general, we found that temporal occupancy can reliably be used to infer habitat  
267 associations, as well as the likelihood of a species maintaining a viable population in the location  
268 where it was observed, under a broad range of conditions. The use of temporal occupancy may be  
269 most problematic in study systems made up of highly isolated habitat fragments where species  
270 commonly disperse from the surrounding landscape matrix, or in habitats or for species with  
271 uniformly low detection probabilities. Ecologists should explicitly consider whether detection  
272 probabilities vary across the environmental gradients in their study systems before using temporal

273 occupancy. Considering the relationship of landscape similarity and detection in specific study  
274 systems will provide a guide for when and how to include temporal occupancy in ecological  
275 analyses.

276

277

## 278 **Acknowledgements**

279 Thank you to K. Eklund and J. Roach for assistance and feedback on the analytic workflow using  
280 a computing cluster. This research was supported the National Science Foundation through grant  
281 DEB-1354563 to A. H. Hurlbert and E. P. White and by the Gordon and Betty Moore  
282 Foundation's Data-Driven Discovery Initiative through Grant GBMF4563 to E. P. White. The  
283 funders had no role in study design, data collection and analysis, decision to publish, or  
284 preparation of the manuscript.

## 285 **References**

- 286 1. Cody ML, Diamond JM. Ecology and Evolution of Communities. Harvard University  
287 Press; 1975.
- 288 2. Chesson P. Mechanisms of maintenance of species diversity. *Annu Rev Ecol Syst.*  
289 2000;31:343–66.
- 290 3. Snell Taylor SJ, Evans BS, White EP, Hurlbert AH. The prevalence and impact of transient  
291 species in ecological communities. *Ecology.* 2018 Aug 1;99(8):1825–35.
- 292 4. Costello MJ, Myers AA. Marine Biodiversity Turnover of transient species as a contributor  
293 to the richness of a stable amphipod (Crustacea) fauna in a sea inlet. *J Exp Mar Biol Ecol.*  
294 1996 Sep 15;202(1):49–62.
- 295 5. Magurran AE, Henderson PA. Explaining the excess of rare species in natural species  
296 abundance distributions. *Nature.* 2003 Apr 17;422(6933):714–6.
- 297 6. Belmaker J. Species richness of resident and transient coral-dwelling fish responds  
298 differentially to regional diversity. *Glob Ecol Biogeogr.* 2009 Jul 1;18(4):426–36.
- 299 7. Coyle JR, Hurlbert Allen H, White EP. Opposing Mechanisms Drive Richness Patterns of  
300 Core and Transient Bird Species. *Am Nat.* 2013 Apr 1;181(4):E83–90.

- 301 8. Supp SR, Koons DN, Ernest SKM. Using life history trade-offs to understand core-transient  
302 structuring of a small mammal community. *Ecosphere*. 2015 Oct 1;6(10):1–15.
- 303 9. Umaña MN, Zhang C, Cao M, Lin L, Swenson NG. A core-transient framework for trait-  
304 based community ecology: an example from a tropical tree seedling community. *Ecol Lett*.  
305 2017 Mar 1;20(5):619–28.
- 306 10. Royle JA, Kéry M, Gautier R, Schmid H. Hierarchical Spatial Models of Abundance and  
307 Occurrence from Imperfect Survey Data. *Ecol Monogr*. 2007 Aug 1;77(3):465–81.
- 308 11. Kéry M, Schmidt B. Imperfect detection and its consequences for monitoring for  
309 conservation. *Community Ecol*. 2008 Dec 1;9(2):207–16.
- 310 12. Kellner KF, Swihart RK. Accounting for Imperfect Detection in Ecology: A Quantitative  
311 Review. *PLOS ONE*. 2014 Oct 30;9(10):e111436.
- 312 13. Cunningham RB, Lindenmayer DB, Nix HA, Lindenmayer BD. Quantifying observer  
313 heterogeneity in bird counts. *Aust J Ecol*. 1999;24(3):270–7.
- 314 14. Kéry M, Royle JA. Hierarchical Bayes estimation of species richness and occupancy in  
315 spatially replicated surveys. *J Appl Ecol*. 2008;45(2):589–98.
- 316 15. MacKenzie DI, Nichols JD, Lachman GB, Droege S, Royle JA, Langtimm CA. Estimating  
317 Site Occupancy Rates When Detection Probabilities Are Less Than One. *Ecology*.  
318 2002;83(8):2248–55.
- 319 16. Royle JA, Nichols JD. Estimating Abundance from Repeated Presence–Absence Data or  
320 Point Counts. *Ecology*. 2003;84(3):777–90.
- 321 17. Hurlbert Allen H. Species–energy relationships and habitat complexity in bird  
322 communities. *Ecol Lett*. 2004;7(8):714–20.
- 323 18. Wintle BA, McCarthy MA, Parris KM, Burgman MA. Precision and Bias of Methods for  
324 Estimating Point Survey Detection Probabilities. *Ecol Appl*. 2004;14(3):703–12.
- 325 19. Shmida A, Wilson MV. Biological Determinants of Species Diversity. *J Biogeogr*.  
326 1985;12(1):1–20.
- 327 20. Pulliam HR. Sources, Sinks, and Population Regulation. *Am Nat*. 1988;132(5):652–61.
- 328 21. Berry EJ, Gorchov DL, Endress BA, Stevens MHH. Source-sink dynamics within a plant  
329 population: the impact of substrate and herbivory on palm demography. *Popul Ecol*. 2008  
330 Jan 1;50(1):63–77.
- 331 22. Petit LJ, Petit DR. Factors Governing Habitat Selection by Prothonotary Warblers: Field  
332 Tests of the Fretwell-Lucas Models. *Ecol Monogr*. 1996;66(3):367–87.

- 333 23. Snell Taylor SJ, Umbanhowar J, Hurlbert AH. The relative importance of biotic and abiotic  
 334 determinants of temporal occupancy for avian species in North America. *Glob Ecol*  
 335 *Biogeogr.* 2020;29(4):736–47.
- 336 24. Boulinier T, Nichols JD, Sauer JR, Hines JE, Pollock KH. Estimating Species Richness:  
 337 The Importance of Heterogeneity in Species Detectability. *Ecology.* 1998;79(3):1018–28.
- 338 25. Johnston A, Newson SE, Risely K, Musgrove AJ, Massimino D, Baillie SR, et al. Species  
 339 traits explain variation in detectability of UK birds. *Bird Study.* 2014 Jul 3;61(3):340–50.
- 340 26. Guillera-Arroita G, Kéry M, Lahoz-Monfort JJ. Inferring species richness using  
 341 multispecies occupancy modeling: Estimation performance and interpretation. *Ecol Evol.*  
 342 2019;9(2):780–92.

343

344

345

346

347

348 **Table 1.** Ways that species can be correctly or incorrectly (boxes in red) classified as  
 349 maintaining a viable population based on temporal occupancy.  $R_0$  refers to the net reproductive  
 350 rate of a species in a location.

351

|                                                    | Maintains a viable population<br>$R_0 \geq 1$ , "core"                                                               | Does not maintain a viable population<br>$R_0 < 1$ , "transient"                                                                                                                  |
|----------------------------------------------------|----------------------------------------------------------------------------------------------------------------------|-----------------------------------------------------------------------------------------------------------------------------------------------------------------------------------|
| Low temporal occupancy, inferred to be "transient" | <b>A:</b> Species that occur persistently at low density or that have traits making them difficult to detect         | <b>B:</b> Species that only irregularly occur in the local habitat because they are poorly suited to that habitat                                                                 |
| High temporal occupancy, inferred to be "core"     | <b>C:</b> Core members of the community that maintain viable populations and are reliably observed almost every year | <b>D:</b> Species that occur regularly in the local habitat despite failing to maintain positive population growth rates due to repeated immigration from adjacent source habitat |
| Error rates                                        | $A / (A + C)$                                                                                                        | $D / (B + D)$                                                                                                                                                                     |

352

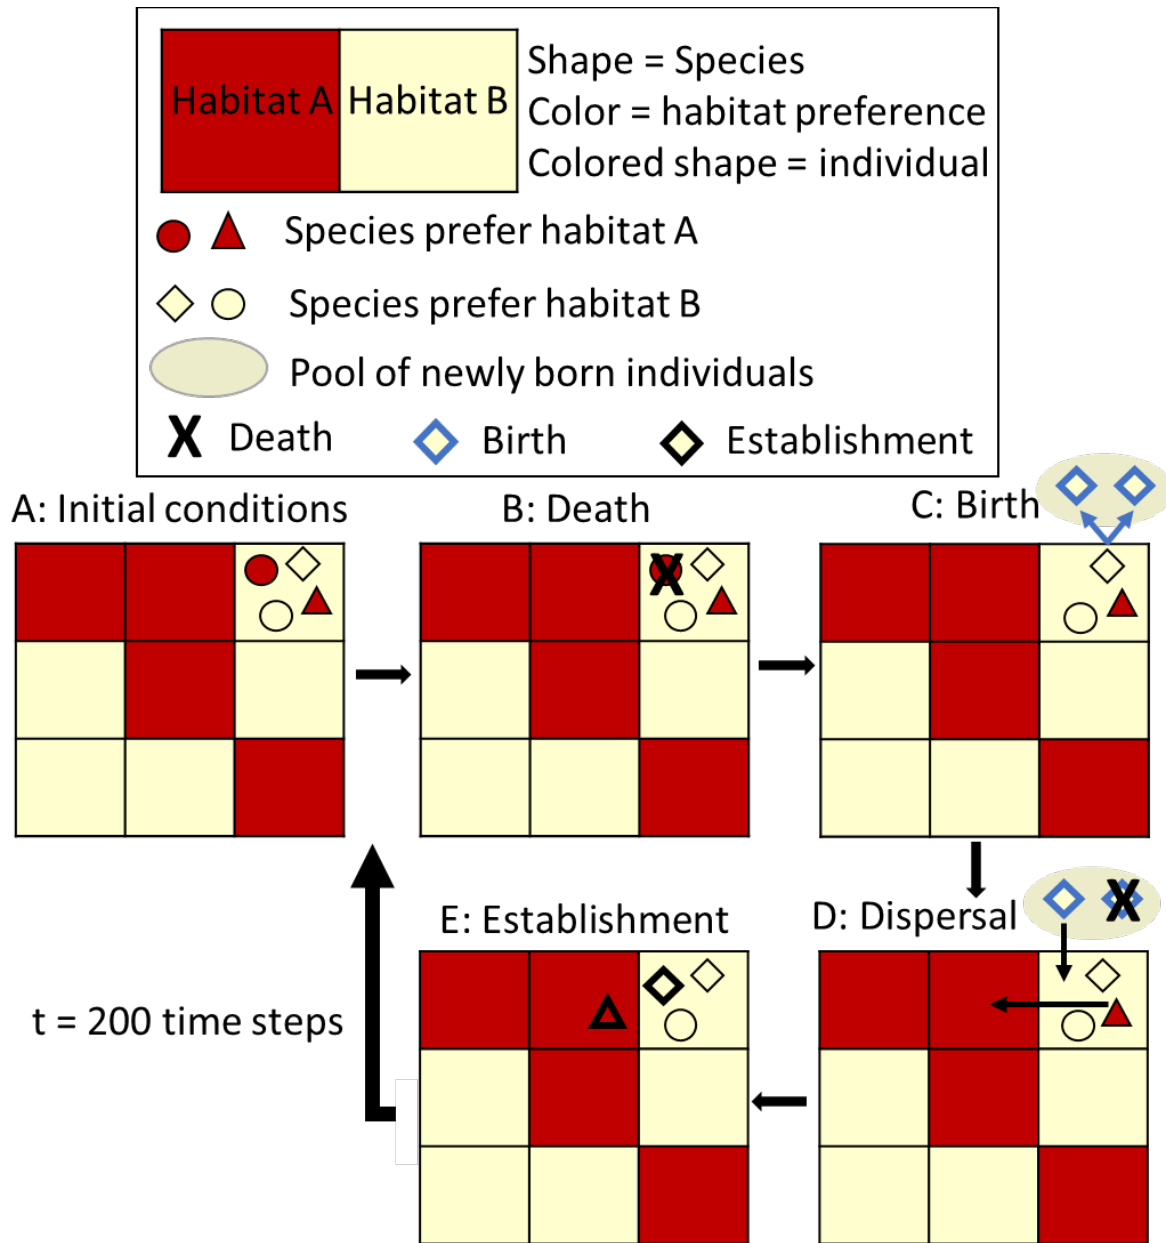

353  
354  
355  
356

**Figure 1.** Schematic documenting the events that occur in a single time step of the simulation, including death, birth, dispersal, and establishment. See text for details.



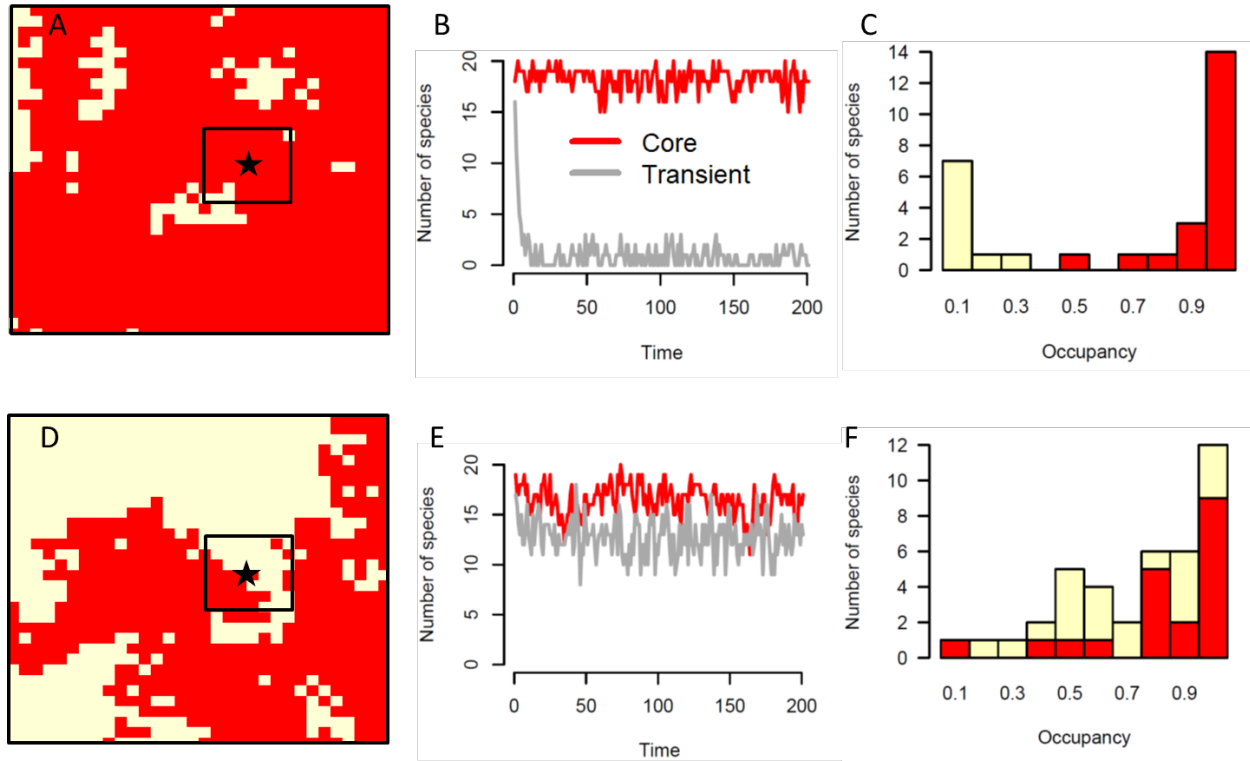

357  
358 **Figure 2.** (A) Sample landscape of one simulation run in which the proportion of the full  
359 landscape that was habitat A (in red) was set to 0.9. Landscape similarity around the focal pixel  
360 is 0.92. (B) Number of core species (that can reproduce in the red habitat, red line) and transient  
361 species (that cannot reproduce in the red habitat, gray line), plotted over time for the focal pixel  
362 from the landscape in (A). (C) Temporal occupancy distribution of the species in the focal pixel  
363 from the landscape in (A). Colors of the bars indicate the number of species according to which  
364 habitat type they can reproduce in. (D) Sample landscape of one simulation run in which the  
365 proportion of the landscape that was habitat A (red) was set to 0.5. Landscape similarity around  
366 the focal pixel is 0.49. (E) Number of core species (red line) and transient species (gray line),  
367 plotted over time for the focal pixel from the landscape in (D). (F) Temporal occupancy  
368 distribution of the species in the focal pixel from the landscape in (D). Colors of the stacked bars  
369 indicate the number of species according to which habitat type they can reproduce in.  
370

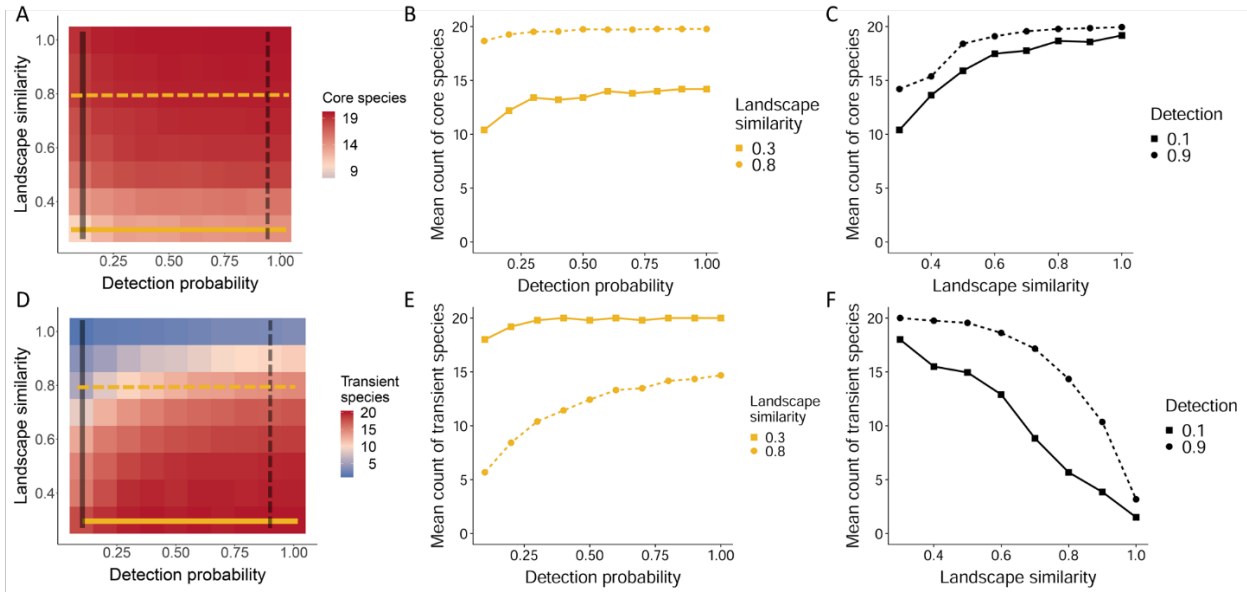

371  
372 **Figure 3.** Mean number of biologically core (A) and biologically transient (D) species observed  
373 for each combination of detection probability and landscape similarity. Line graphs (B, E) show  
374 the mean count of core species (B) or transient species (E) for each detection probability at low  
375 (0.3, solid line) or high (0.8, dashed line) landscape similarity. Line graphs (C, F) show the mean  
376 count of core species (C) or transient species (F) with increasing landscape similarity at low (0.1,  
377 solid line) or high (0.9, dashed line) detection probability.  
378  
379  
380  
381  
382  
383  
384  
385  
386  
387  
388

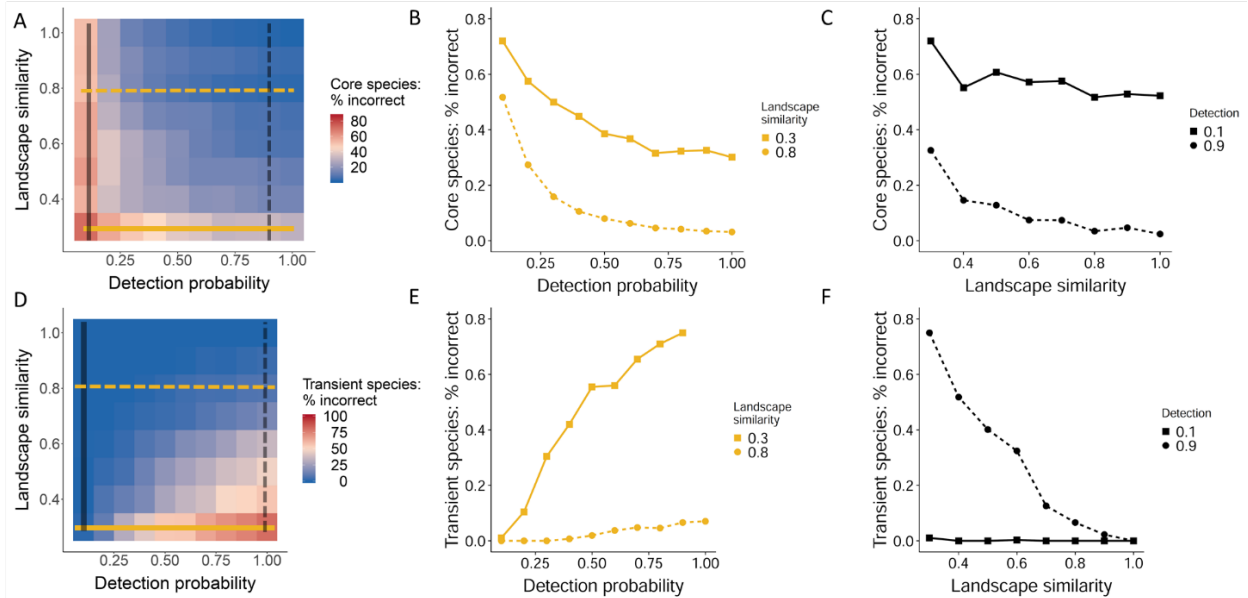

389  
390 **Figure 4.** Percent of biologically core (A) species that were incorrectly inferred to be transient  
391 and biologically transient (D) species that were incorrectly inferred to be core for each  
392 combination of detection probability and landscape similarity. The x-axis is the average species  
393 detection probability for the simulation run, while the y-axis is the proportion of a 7 x 7  
394 landscape surrounding the focal pixel that is of the same habitat type. Line graphs (B, E) show  
395 the percent of incorrect classifications of core species (B) or transient species (E) for each  
396 detection probability at low (0.3, solid line) or high (0.8, dashed line) landscape similarity. Line  
397 graphs (C, F) show the percent of incorrect classifications of core species (C) or transient species  
398 (F) with increasing landscape similarity at low (0.1, solid line) or high (0.9, dashed line)  
399 detection probability.  
400

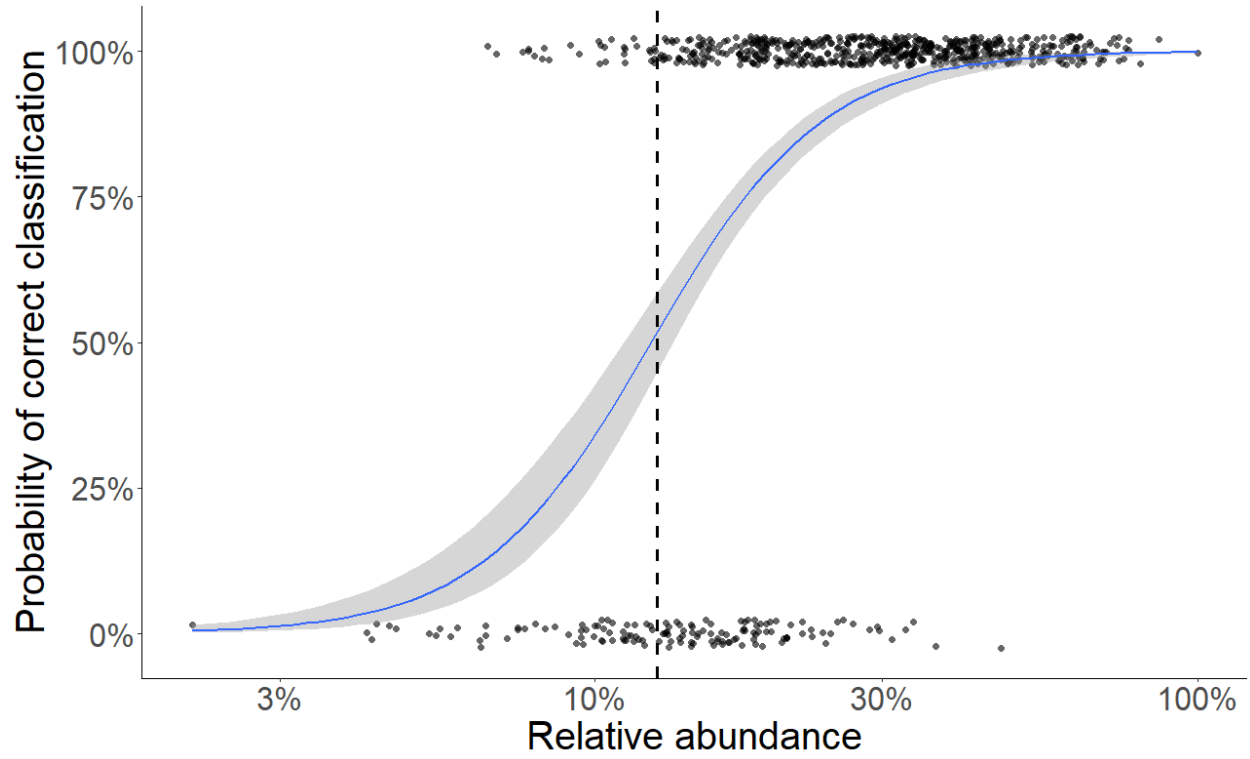

401  
402 **Figure 5.** Probability of correct classification of biologically core species based on temporal  
403 occupancy as a function of the log of landscape wide abundance (relative to the abundance of the  
404 most abundant species, 100%). Dashed line indicates the location of the inflection point.  
405
